# Supplementary material for: Microbiological Diversity and Associated Enzymatic Activities in Honey and Pollen from Stingless Bees from Northern Argentina
Source: Microorganisms. 2024 Mar 30;12(4):711. doi: 10.3390/microorganisms12040711 (PMC11051704; doi:10.3390/microorganisms12040711)
Supplement: Supplementary file 1 [file microorganisms-12-00711-s001.zip › Supplementary Data S1.xlsx]

## Sheet: BLAST_filtros
Strain	Query Length	Description	Scientific Name	Genus	Max Score	Total Score	Query Cover	E value	Per. Ident	Acc. Len	Accession
101_Sj_h_16	1081	Paenibacillus polymyxa strain YC0573 chromosome, complete genome	Paenibacillus polymyxa	Paenibacillus	1905	22693	0.98	0	0.9915	6126117	CP017968.3
11_Tf_p_17	1323	Escherichia sp. strain MGPBL5 16S ribosomal RNA gene, partial sequence	Escherichia sp.	Escherichia	1173	1173	0.65	0	0.9137	1120	MH608345.1
113_Tf_h_17	1300	Zymobacter palmae IAM14233 DNA, complete genome	Zymobacter palmae	Zymobacter	939	7508	0.8	0	0.8383	3023483	AP018933.1
115_Tf_h_17	1191	Bacillus sp. Cp7 16S ribosomal RNA gene, partial sequence	Bacillus sp. Cp7	Bacillus	1929	1929	0.99	0	0.9622	1487	KX094476.1
11B_Sj_p_17	956	Bacillus pumilus strain BT 6 16S ribosomal RNA gene, partial sequence	Bacillus pumilus	Bacillus	1472	1472	0.94	0	0.9623	1459	KJ848547.1
12_Sj_h_16	1086	Bacillus pumilus strain Y11 16S ribosomal RNA gene, partial sequence	Bacillus pumilus	Bacillus	1899	1899	0.99	0	0.9852	1457	KF641804.1
12A_Sj_h_17	1207	Pantoea agglomerans strain AIMST 2.A.sub4L 16S ribosomal RNA gene, partial sequence	Pantoea agglomerans	Pantoea	455	455	0.51	8e-123	0.8003	640	JF819683.1
135_Tf_h_17	1492	Curtobacterium citreum strain DSM 20528 16S ribosomal RNA gene, partial sequence	Curtobacterium citreum	Curtobacterium	1029	1029	0.51	0	0.9118	1040	MN894064.1
14_Tf_h_17	1076	Zymobacter palmae IAM14233 DNA, complete genome	Zymobacter palmae	Zymobacter	1905	15234	0.98	0	0.9915	3023483	AP018933.1
141_Tf_h_17	1262	Bacillus sp. NCCP-2323 gene for 16S ribosomal RNA, partial sequence	Bacillus sp. NCCP-2323	Bacillus	1799	1799	0.92	0	0.9503	1142	LC705358.1
144_Tf_p_17	948	Escherichia coli strain EP5 16S ribosomal RNA gene, partial sequence	Escherichia coli	Escherichia	560	560	0.6	1e-154	0.8411	1074	KU904492.1
146_Tf_h_17	1505	Paenibacillus cineris J38TS4 gene for 16S rRNA, partial sequence	Paenibacillus cineris	Paenibacillus	2769	2769	1	0	1	1508	LC588565.1
147_Tf_h_17	1020	Escherichia coli strain CEE12 16S ribosomal RNA gene, partial sequence	Escherichia coli	Escherichia	1127	1127	0.83	0	0.9043	932	MN064646.1
15_Tf_h_17	1268	Bacillus zhangzhouensis strain B2.S2.2.2_5W24 16S ribosomal RNA gene, partial sequence	Bacillus zhangzhouensis	Bacillus	1954	1954	0.96	0	0.9591	1352	OK644239.1
151_Tf_h_17	1239	Escherichia coli strain SE6-3 16S ribosomal RNA gene, partial sequence	Escherichia coli	Escherichia	2036	2036	0.96	0	0.9758	1294	MH511549.1
152_Tf_h_17	972	Bacillus wiedmannii strain D119 16S ribosomal RNA gene, partial sequence	Bacillus wiedmannii	Bacillus	761	761	0.82	0	0.8422	1389	MF681896.1
16A_Sj_h_17	930	Bacillus cereus strain 2.2PT1 16S ribosomal RNA gene, partial sequence	Bacillus cereus	Bacillus	1343	1343	0.79	0	0.9959	1059	MK648336.1
18_Sj_h_16	1399	Escherichia coli strain UEP 16S ribosomal RNA gene, partial sequence	Escherichia coli	Escherichia	737	737	0.63	0	0.8343	972	OL539543.1
19_Tf_h_17	1202	Enterobacteriaceae bacterium secondary endosymbiont of Mycopsylla proxima isolate Nec 16S ribosomal RNA gene, partial sequence	Enterobacteriaceae bacterium secondary endosymbiont of Mycopsylla proxima	Enterobacter	1688	1688	0.95	0	0.9398	1446	KT273276.1
190_Tf_p_17	995	Bacillus halotolerans strain JZ7 16S ribosomal RNA gene, partial sequence	Bacillus halotolerans	Bacillus	1105	1105	0.92	0	0.8791	1449	MH512910.1
195_Tf_p_17	1668	Bacillus amyloliquefaciens Mar31 gene for 16S rRNA, partial sequence	Bacillus amyloliquefaciens	Bacillus	1332	1332	0.55	0	0.9336	943	LC586143.1
196_Tf_p_17	995	Bacillus halotolerans strain JZ7 16S ribosomal RNA gene, partial sequence	Bacillus halotolerans	Bacillus	1105	1105	0.92	0	0.8791	1449	MH512910.1
1A_Sj_h_17	1280	Escherichia coli NRC1-EC gene for 16S ribosomal RNA, partial sequence	Escherichia coli	Escherichia	1725	1725	0.94	0	0.9289	1223	LC455960.1
1A_Tf_h_17	1280	Escherichia coli NRC1-EC gene for 16S ribosomal RNA, partial sequence	Escherichia coli	Escherichia	1725	1725	0.94	0	0.9289	1223	LC455960.1
201_Sj_h_16	1083	Cellulosimicrobium cellulans strain 21 16S ribosomal RNA gene, partial sequence	Cellulosimicrobium cellulans	Cellulosimicrobium	1932	1932	0.97	0	0.9962	1409	KR349463.1
202_Sj_h_16	1213	Escherichia sp. strain MGPBL5 16S ribosomal RNA gene, partial sequence	Escherichia sp.	Escherichia	1303	1303	0.83	0	0.9047	1120	MH608345.1
202_Tf_p_17	1280	Escherichia sp. strain MGPBL5 16S ribosomal RNA gene, partial sequence	Escherichia sp.	Escherichia	1308	1308	0.77	0	0.9075	1120	MH608345.1
204_Tf_p_17	1252	Escherichia sp. strain MGPBL5 16S ribosomal RNA gene, partial sequence	Escherichia sp.	Escherichia	1435	1435	0.83	0	0.918	1120	MH608345.1
21_Tf_p_17	1217	Bacillus clausii strain BRM043935 16S ribosomal RNA gene, partial sequence	Alkalihalobacillus clausii	Alkalihalobacillus	1847	1847	0.95	0	0.9546	1417	MH305350.1
210_Tf_p_17	1723	Bacillus pumilus strain PK3 16S ribosomal RNA gene, partial sequence	Bacillus pumilus	Bacillus	841	841	0.56	0	0.841	899	MT801055.1
217_Tf_p_17	1161	Bacillus sp. YLCr35 16S ribosomal RNA gene, partial sequence	Bacillus sp. YLCr35	Bacillus	521	521	0.73	7e-143	0.785	1431	HQ843091.1
223_Tf_p_17	1140	Bacillus sinesaloumensis strain CPO 4.265 16S ribosomal RNA gene, partial sequence	Bacillus sinesaloumensis	Bacillus	1336	1336	0.85	0	0.9108	1392	MW429731.1
23_Tf_h_16	1097	Bacillus safensis strain D11 16S ribosomal RNA gene, partial sequence	Bacillus safensis	Bacillus	1975	1975	0.98	0	0.9981	1404	KX068630.1
230_Tf_p_17	1300	Bacillus subtilis strain YKF2 16S ribosomal RNA gene, partial sequence	Bacillus subtilis	Bacillus	1498	1498	0.81	0	0.925	1050	KU667124.1
240_Tf_p_17	1671	Escherichia fergusonii strain UFV 503 16S ribosomal RNA gene, partial sequence	Escherichia fergusonii	Escherichia	1090	1090	0.51	0	0.9058	822	MN557806.1
2A_Sj_h_17	652	Bacillus subtilis strain R82 16S ribosomal RNA gene, partial sequence	Bacillus subtilis	Bacillus	202	202	0.9	6e-47	0.7331	1317	KU752841.1
30B_Sj_p_17	810	Escherichia coli strain ES37G 16S ribosomal RNA gene, partial sequence	Escherichia coli	Escherichia	571	571	0.53	5e-158	0.9004	1354	MZ496658.1
31_Tf_h_16	1362	Bacillus pumilus strain PK3 16S ribosomal RNA gene, partial sequence	Bacillus pumilus	Bacillus	1155	1155	0.68	0	0.9014	899	MT801055.1
33_Tf_h_16	1033	Bacillus safensis subsp. safensis strain EGI17 16S ribosomal RNA gene, partial sequence	Bacillus safensis subsp. safensis	Bacillus	1853	1853	0.98	0	0.997	1451	MN704393.1
33_Tf_h_17	1237	Escherichia coli strain 01P2R2D2E5 16S ribosomal RNA gene, partial sequence	Escherichia coli	Escherichia	1989	1989	0.99	0	0.9625	1290	ON054352.1
34_Tf_h_17	1059	Uncultured Bacillus sp. clone C.la-8 16S ribosomal RNA gene, partial sequence	uncultured Bacillus sp.	Bacillus	1905	1905	0.98	0	0.9971	1472	JX504892.1
36_Tf_h_17	1091	Zymobacter palmae strain NBRC 102412 16S ribosomal RNA, partial sequence	Zymobacter palmae	Zymobacter	1882	1882	0.98	0	0.9841	1465	NR_114073.1
38_Tf_h_16	1504	Bacillus pumilus strain G006 16S ribosomal RNA gene, partial sequence	Bacillus pumilus	Bacillus	1897	1897	0.98	0	0.9971	1453	KY127313.1
39_Tf_h_17	1198	Escherichia coli strain E16 16S ribosomal RNA gene, partial sequence	Escherichia coli	Escherichia	1941	1941	0.99	0	0.9631	1261	KY780351.1
3A_Sj_h_17	1287	Bacillus pumilus strain C-2 SWK-7 16S ribosomal RNA gene, partial sequence	Bacillus pumilus	Bacillus	1184	1184	0.71	0	0.9037	1043	MK501617.1
40_Sj_h_16	1078	Bacillus pumilus strain G006 16S ribosomal RNA gene, partial sequence	Bacillus pumilus	Bacillus	1914	1914	0.97	0	0.9953	1453	KY127313.1
400_Sj_h_16	1100	Escherichia coli strain KENECE3 16S ribosomal RNA gene, partial sequence	Escherichia coli	Escherichia	955	955	0.92	0	0.8393	1185	MK606097.1
402_Sj_h_16	1189	Paenibacillus cineris strain CRRI-34 16S ribosomal RNA gene, partial sequence	Paenibacillus cineris	Paenibacillus	1941	1941	0.99	0	0.9655	1448	JN592451.1
41_Sj_h_16	1073	Curtobacterium sp. EP_L_2 16S ribosomal RNA gene, partial sequence	Curtobacterium sp. EP_L_2	Curtobacterium	1905	1905	0.97	0	0.9943	1093	KJ642424.1
41_Tf_h_17	1269	Bacillus pumilus strain C-2 SWK-7 16S ribosomal RNA gene, partial sequence	Bacillus pumilus	Bacillus	1170	1170	0.83	0	0.8729	1043	MK501617.1
43_Sj_h_16	1083	Bacillus safensis strain D11 16S ribosomal RNA gene, partial sequence	Bacillus safensis	Bacillus	1919	1919	0.98	0	0.9925	1404	KX068630.1
456_Tf_h_16	1541	Escherichia coli strain CCFM8335 16S ribosomal RNA gene, partial sequence	Escherichia coli	Escherichia	1155	1155	0.53	0	0.9284	1432	KJ803892.1
4A_Sj_h_17	1225	Bacillus mojavensis strain REP303 16S ribosomal RNA gene, partial sequence	Bacillus mojavensis	Bacillus	1862	1862	0.94	0	0.9587	1279	MW344082.1
50_Tf_h_16	1221	Bacillus zhangzhouensis strain YT225 16S ribosomal RNA gene, partial sequence	Bacillus zhangzhouensis	Bacillus	2030	2030	0.96	0	0.978	1182	MW405654.1
51_Sj_h_16	1269	Bacillus aryabhattai strain CCBDBXm1-11 16S ribosomal RNA gene, partial sequence	Priestia aryabhattai	Priestia	1794	1794	0.94	0	0.9433	1162	MK386694.1
53_Tf_h_16	1049	Staphylococcus epidermidis strain BP11 16S ribosomal RNA gene, partial sequence	Staphylococcus epidermidis	Staphylococcus	1884	1884	0.98	0	0.9971	1470	MT482624.1
56_Tf_h_16	1068	Bacillus safensis strain WB-260 16S ribosomal RNA gene, partial sequence	Bacillus safensis	Bacillus	1845	1845	0.98	0	0.9839	1447	KJ210650.1
56_Tf_h_17	1268	Cronobacter sakazakii strain G220 16S ribosomal RNA gene, partial sequence	Cronobacter sakazakii	Cronobacter	2034	2034	0.98	0	0.9641	1449	KP340438.1
57_Tf_h_17	1243	Escherichia coli strain 01P2R2D2E5 16S ribosomal RNA gene, partial sequence	Escherichia coli	Escherichia	2025	2025	0.98	0	0.9667	1290	ON054352.1
63_Sj_h_16	1340	Bacillus pumilus strain BT 6 16S ribosomal RNA gene, partial sequence	Bacillus pumilus	Bacillus	1703	1703	0.77	0	0.9654	1459	KJ848547.1
66_Sj_h_16	918	Paenibacillus sp. strain 23B2.1 16S ribosomal RNA gene, partial sequence	Paenibacillus sp.	Paenibacillus	466	466	0.79	3e-126	0.7908	1435	MK456432.1
73_Sj_h_16	1238	Bacillus sp. Cp10(2016) 16S ribosomal RNA gene, partial sequence	Bacillus sp. Cp10(2016)	Bacillus	1901	1901	0.89	0	0.9766	1468	KX094479.1
73_Tf_h_17	1222	Escherichia coli strain E23 16S ribosomal RNA gene, partial sequence	Escherichia coli	Escherichia	1851	1851	0.96	0	0.9542	1208	KY780358.1
74_Sj_h_16_(2)	1322	Uncultured Staphylococcus sp. clone JZ 3 16S ribosomal RNA gene, partial sequence	uncultured Staphylococcus sp.	Staphylococcus	1500	1500	0.84	0	0.9147	1106	MW493145.1
77_Sj_h_16	1132	Bacillus safensis strain D46_SP3R 16S ribosomal RNA gene, partial sequence	Bacillus safensis	Bacillus	1823	1823	0.96	0	0.9689	1220	MK883152.1
77B_Sj_p_17	985	Escherichia fergusonii strain UFV 503 16S ribosomal RNA gene, partial sequence	Escherichia fergusonii	Escherichia	1347	1347	0.84	0	0.9605	822	MN557806.1
78_Sj_h_16	1193	Bacillus sp. TA_EU partial 16S rRNA gene, strain TA_EU	Bacillus sp. TA_EU	Bacillus	1600	1600	0.85	0	0.9521	1141	HG942096.1
83_Sj_h_16	1108	Bacillus megaterium strain KP025f 16S ribosomal RNA gene, partial sequence	Priestia megaterium	Priestia	1816	1816	0.93	0	0.9846	1140	KT200437.1
85_Sj_h_16	1131	Bacillus safensis strain D46_SP3R 16S ribosomal RNA gene, partial sequence	Bacillus safensis	Bacillus	1748	1748	0.94	0	0.9645	1220	MK883152.1
85_Tf_h_17_(2)	1225	Escherichia coli strain 01P2R2D2E5 16S ribosomal RNA gene, partial sequence	Escherichia coli	Escherichia	2093	2093	0.99	0	0.9779	1290	ON054352.1
86B_Sj_p_17	1105	Bacillus megaterium strain SM-94 16S ribosomal RNA gene, partial sequence	Priestia megaterium	Priestia	1775	1775	0.96	0	0.9683	1425	MT377908.1
87B_Sj_p_17	1083	Escherichia sp. 12 16S ribosomal RNA gene, partial sequence	Escherichia sp. 12	Escherichia	678	678	0.76	0	0.8167	1280	KC819115.1
9_Tf_h_16	1535	Bacillus aerius strain NIBSM_LsF3 16S ribosomal RNA gene, partial sequence	Bacillus aerius	Bacillus	1402	1402	0.6	0	0.9429	916	MH393318.1
91_Tf_h_17	1196	Escherichia coli strain E17 16S ribosomal RNA gene, partial sequence	Escherichia coli	Escherichia	1914	1914	0.95	0	0.9719	1243	KY780352.1
96_Tf_h_17	1207	Escherichia coli strain 265-a white 16S ribosomal RNA gene, partial sequence	Escherichia coli	Escherichia	2076	2076	0.99	0	0.9808	1193	MN208099.1
