# Supplementary material for: Microbiological Diversity and Associated Enzymatic Activities in Honey and Pollen from Stingless Bees from Northern Argentina
Source: Microorganisms. 2024 Mar 30;12(4):711. doi: 10.3390/microorganisms12040711 (PMC11051704; doi:10.3390/microorganisms12040711)
Supplement: Supplementary file 1 [file microorganisms-12-00711-s001.zip › Supplementary Data S3.xlsx]

## Sheet: data
Cluster ID	Proteolytic	Amylolytic	Lipolytic	Xylanolytic	Cellulolytic	Strain	Genus	Year	Source	Bee	IC Cluster Index	IC Data Index
C (5)	59.2593	0	0	0	0	38_Tf_h_16	Bacillus	2016	honey	Tf	0	42
C (5)	55.5556	0	0	0	0	202_Sj_h_16	Escherichia	2016	honey	Sj	1	25
C (5)	59.2593	8.33333	0	0	0	2A_Sj_h_17	Bacillus	2017	honey	Sj	2	35
C (5)	51.8519	25	0	0	0	3A_Sj_h_17	Bacillus	2017	honey	Sj	3	44
C (5)	33.3333	0	0	0	0	21_Tf_p_17	Alkalihalobacillus	2017	polen	Tf	4	28
C (5)	40.7407	0	0	0	0	1A_Sj_h_17	Escherichia	2017	honey	Sj	5	22
C (5)	44.4444	0	0	0	10	39_Tf_h_17	Escherichia	2017	honey	Tf	6	43
C (5)	44.4444	16.6667	57.1429	12.5	0	201_Sj_h_16	Cellulosimicrobium	2016	honey	Sj	7	24
C (5)	44.4444	25	42.8571	21.875	0	12_Sj_h_16	Bacillus	2016	honey	Sj	8	5
C (5)	18.5185	0	0	0	0	73_Tf_h_17	Escherichia	2017	honey	Tf	9	62
C (5)	18.5185	0	0	0	0	11_Tf_p_17	Escherichia	2017	polen	Tf	10	1
C (5)	22.2222	0	0	0	0	56_Tf_h_17	Cronobacter	2017	honey	Tf	11	57
C (5)	25.9259	0	0	6.25	0	33_Tf_h_16	Bacillus	2016	honey	Tf	12	38
C (5)	14.8148	8.33333	0	3.125	0	210_Tf_p_17	Bacillus	2017	polen	Tf	13	29
C (5)	14.8148	0	14.2857	0	0	144_Tf_p_17	Escherichia	2017	polen	Tf	14	10
C (5)	11.1111	0	14.2857	3.125	0	12A_Sj_h_17	Pantoea	2017	honey	Sj	15	6
C (5)	18.5185	0	0	12.5	18.75	43_Sj_h_16	Bacillus	2016	honey	Sj	16	50
C (5)	3.7037	0	0	0	7.5	204_Tf_p_17	Escherichia	2017	polen	Tf	17	27
C (5)	0	0	0	0	2.5	18_Sj_h_16	Escherichia	2016	honey	Sj	18	17
C (5)	7.40741	0	0	0	0	19_Tf_h_17	Enterobacter	2017	honey	Tf	19	18
C (5)	7.40741	0	0	0	0	141_Tf_h_17	Bacillus	2017	honey	Tf	20	9
C (5)	7.40741	0	0	0	0	36_Tf_h_17	Zymobacter	2017	honey	Tf	21	41
C (5)	11.1111	0	0	0	0	147_Tf_h_17	Escherichia	2017	honey	Tf	22	12
C (5)	7.40741	16.6667	0	0	0	240_Tf_p_17	Escherichia	2017	polen	Tf	23	34
C (5)	0	16.6667	0	0	0	196_Tf_p_17	Bacillus	2017	polen	Tf	24	21
C (5)	18.5185	33.3333	0	0	0	195_Tf_p_17	Bacillus	2017	polen	Tf	25	20
C (5)	29.6296	25	0	6.25	0	16A_Sj_h_17	Bacillus	2017	honey	Sj	26	16
C (5)	7.40741	33.3333	14.2857	6.25	0	217_Tf_p_17	Bacillus	2017	polen	Tf	27	30
C (5)	14.8148	16.6667	0	21.875	0	230_Tf_p_17	Bacillus	2017	polen	Tf	28	33
C (5)	0	0	28.5714	9.375	0	77B_Sj_p_17	Escherichia	2017	polen	Sj	29	65
C (5)	0	0	28.5714	15.625	28.75	73_Sj_h_16	Bacillus	2016	honey	Sj	30	61
C (5)	55.5556	8.33333	0	93.75	0	9_Tf_h_16	Bacillus	2016	honey	Tf	31	72
C (5)	33.3333	0	0	46.875	0	41_Sj_h_16	Curtobacterium	2016	honey	Sj	32	48
C (4)	37.037	58.3333	0	0	0	30B_Sj_p_17	Escherichia	2017	polen	Sj	33	36
C (4)	29.6296	58.3333	0	0	0	190_Tf_p_17	Bacillus	2017	polen	Tf	34	19
C (4)	25.9259	50	0	0	0	34_Tf_h_17	Bacillus	2017	honey	Tf	35	40
C (4)	22.2222	50	0	0	0	152_Tf_h_17	Bacillus	2017	honey	Tf	36	15
C (4)	37.037	75	0	0	12.5	4A_Sj_h_17	Bacillus	2017	honey	Sj	37	52
C (4)	18.5185	58.3333	0	0	0	86B_Sj_p_17	Priestia	2017	polen	Sj	38	70
C (4)	14.8148	66.6667	0	0	0	41_Tf_h_17	Bacillus	2017	honey	Tf	39	49
C (4)	0	50	0	0	0	456_Tf_h_16	Escherichia	2016	honey	Tf	40	51
C (4)	0	50	0	0	0	223_Tf_p_17	Bacillus	2017	polen	Tf	41	31
C (4)	33.3333	100	0	0	0	96_Tf_h_17	Escherichia	2017	honey	Tf	42	74
C (4)	55.5556	100	0	0	5	91_Tf_h_17	Escherichia	2017	honey	Tf	43	73
C (4)	77.7778	33.3333	14.2857	0	0	85_Tf_h_17	Escherichia	2017	honey	Tf	44	69
C (4)	100	33.3333	0	3.125	2.5	113_Tf_h_17	Zymobacter	2017	honey	Tf	45	2
C (4)	62.963	33.3333	14.2857	31.25	27.5	101_Sj_h_16	Paenibacillus	2016	honey	Sj	46	0
C (3)	22.2222	16.6667	100	0	0	53_Tf_h_16	Staphylococcus	2016	honey	Tf	47	55
C (3)	14.8148	16.6667	71.4286	0	0	202_Tf_p_17	Escherichia	2017	polen	Tf	48	26
C (3)	0	0	85.7143	18.75	12.5	23_Tf_h_16	Bacillus	2016	honey	Tf	49	32
C (3)	37.037	8.33333	100	87.5	0	78_Sj_h_16	Bacillus	2016	honey	Sj	50	66
C (2)	0	0	14.2857	75	40	74_Sj_h_16	Staphylococcus	2016	honey	Sj	51	63
C (2)	0	0	0	100	85	63_Sj_h_16	Bacillus	2016	honey	Sj	52	59
C (2)	7.40741	16.6667	71.4286	93.75	87.5	50_Tf_h_16	Bacillus	2016	honey	Tf	53	53
C (1)	59.2593	33.3333	0	56.25	97.5	85_Sj_h_16	Bacillus	2016	honey	Sj	54	68
C (1)	55.5556	25	0	56.25	100	77_Sj_h_16	Bacillus	2016	honey	Sj	55	64
C (1)	33.3333	16.6667	0	0	70	56_Tf_h_16	Bacillus	2016	honey	Tf	56	56
